# Supplementary material for: Developing a Chromochloris zofingiensis Mutant for Enhanced Production of Lutein under CO2 Aeration
Source: MDPI journal article supplement (doi:10.3390/md20030194), 2022-03-07
Supplement: s1 [file s1]

Supplementary data

**Developing a *Chromochloris zofingiensis* mutant for enhanced  
production of lutein under CO<sub>2</sub> aeration**

**Yuanyuan Ren <sup>1,2,3</sup>, Jinquan Deng <sup>2,3</sup>, Yan Lin <sup>2,3</sup>, Junchao Huang <sup>2,3,\*</sup> and Feng Chen <sup>2,3,\*</sup>**

<sup>1</sup> Institute for Food and Bioresource Engineering, College of Engineering, Peking University, Beijing, 100871, China; 1701111648@pku.edu.cn (Y.R.)

<sup>2</sup> Shenzhen Key Laboratory of Marine Microbiome Engineering, Institute for Advanced Study, Shenzhen University, Shenzhen 518060, China; 1900392002@email.szu.edu.cn (J.D.); yanhely@163.com (Y.L.);

<sup>3</sup> Institute for Innovative Development of Food Industry, Shenzhen University, Shenzhen 518060, China;

\* Correspondence: huangjc65@szu.edu.cn (J.H.) ; sfchen@szu.edu.cn (F.C.)



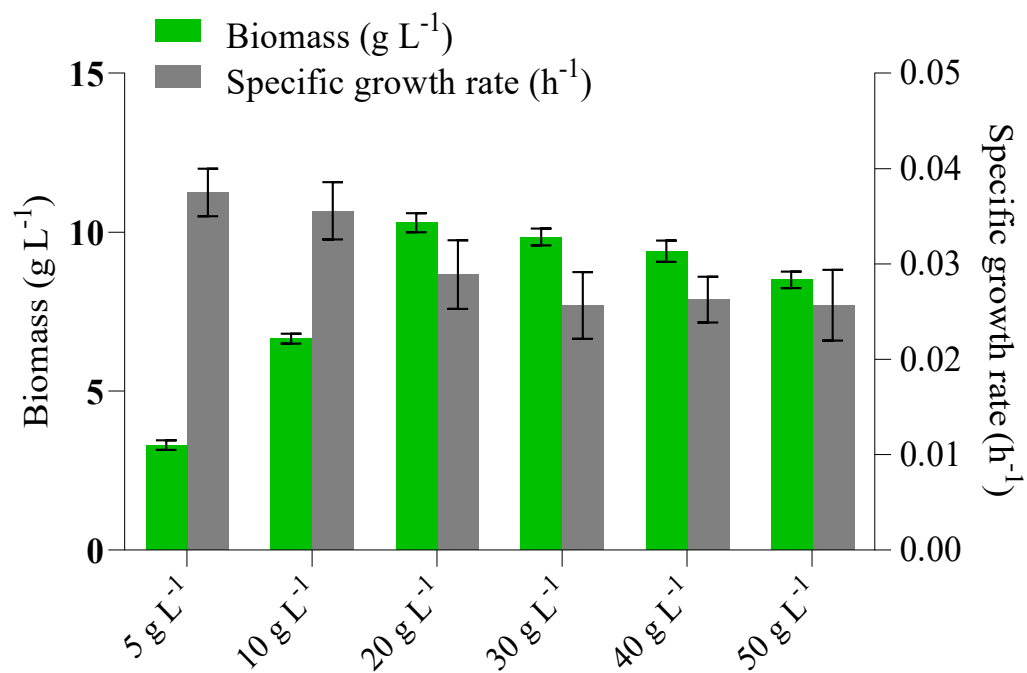

**Supplemental figure S2.** Biomass concentration and the specific growth rate of *Cz-pkg* under cultivation with different glucose concentrations. Data were presented in the form of mean  $\pm$  the standard deviation ( $n = 3$ ).
